# Supplementary material for: Source Memory for Mental Imagery: Influences of the Stimuli’s Ease of Imagery
Source: PubMed Central journal article supplement (PMC4659550; doi:10.1371/journal.pone.0143694), 2015-11-25

Leaves

Birds

Butterflies

Insects

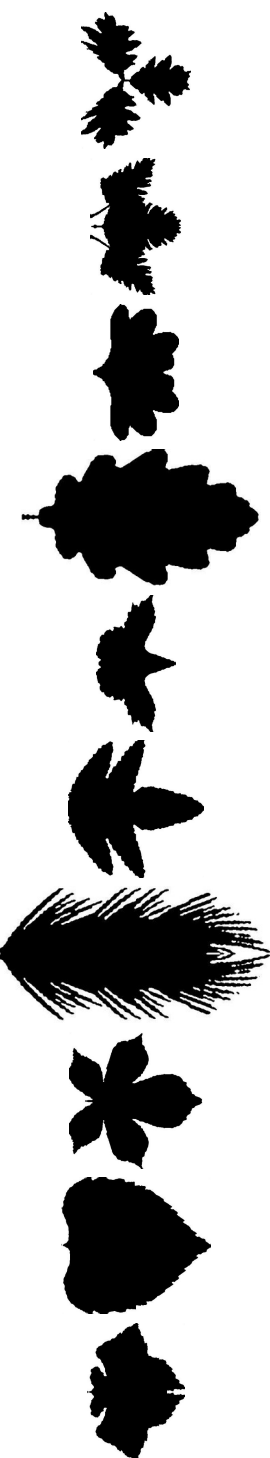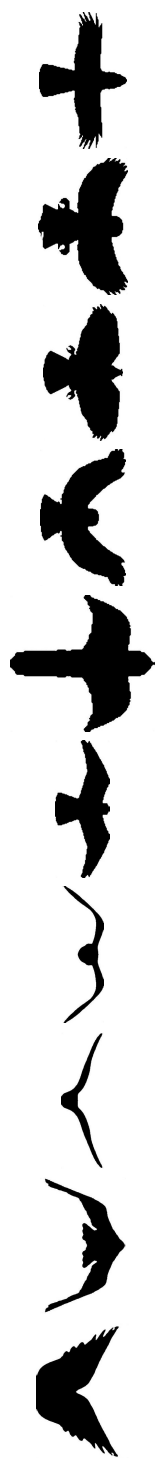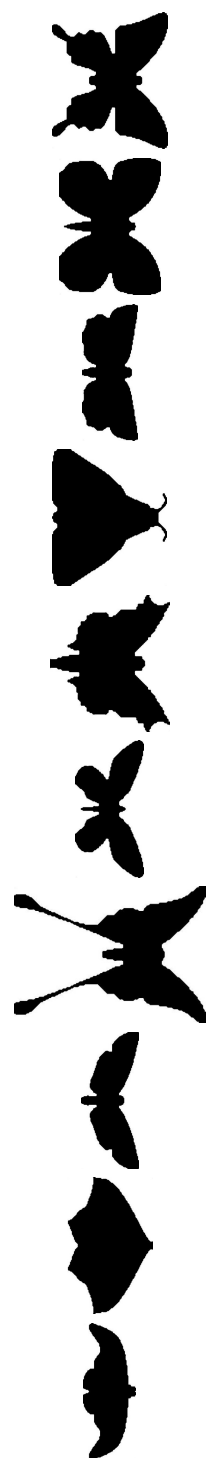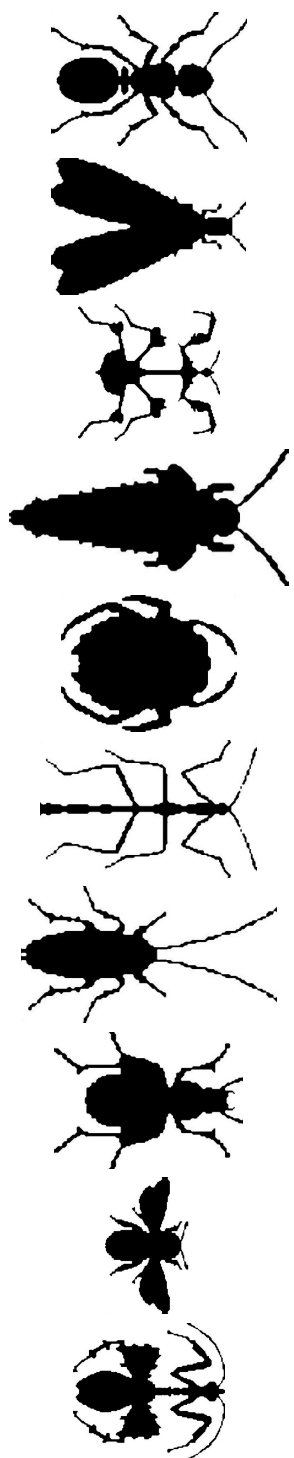

Supplement: pone.0143694.s001.pdf [file pone.0143694.s001.pdf]
