# Supplementary material for: Source Memory for Mental Imagery: Influences of the Stimuli’s Ease of Imagery
Source: PubMed Central journal article supplement (PMC4659550; doi:10.1371/journal.pone.0143694), 2015-11-25
Supplement: pone.0143694.s002.pdf [file pone.0143694.s002.pdf]

## Pretest: Stimulus Validation

**Encoding** Presentation of 20 halved stimuli, completion of the stimuli to symmetrical stimuli was demanded and subjects had to rate each stimulus on 4 variables, while the presentation of the stimulus:

**Recognition** Recognition test for the, now completely presented 20 stimuli and 20 distractor stimuli. The results of the recognition test were used to calculate the discriminability of the items  $d'$  for every stimulus.

**Results** The ratings of the stimulus features were strongly inter-correlated, but not significantly correlated with the discriminability of the stimuli,  $d'$ . A principle component analysis of stimulus features was conducted, resulting in a single factor structure with the factor ease of imagery (EI). EI explains 79.33% of the variance and has an eigenvalue of 3.97. Intercorrelation of stimulus features, and discriminability  $d'$  and correlation with extracted factor from PCA are depicted in the following Table.

Table 1  
*Inter-correlations of stimulus features, and discriminability  $d'$  and correlation with extracted factor from PCA*

| Pearson's r (n=80) | dImag | eImag   | com    | fam     | sem     | EI      | $d'$ |
|--------------------|-------|---------|--------|---------|---------|---------|------|
| dImag              | -     | -.79*** | .59*** | -.75*** | -.70*** | -.86*** | -.03 |
| eImag              |       | -       | .82*** | .89***  | .78***  | .96***  | -.02 |
| com                |       |         | -      | -.65*** | -.57*** | -.83*** | .09  |
| fam                |       |         |        | -       | .86***  | .94***  | -.04 |
| sem                |       |         |        |         | -       | .86***  | .09  |
